# Supplementary material for: Influence of counter-anions during electrochemical deposition of ZnO on the charge transport dynamics in dye-sensitized solar cells
Source: Royal Society of Chemistry journal article supplement (doi:10.1039/c4cp00723a), 2014-11-26
Supplement: c4cp00723a1.pdf [file c4cp00723a1.pdf]

## Electronic Supplementary Information (ESI)

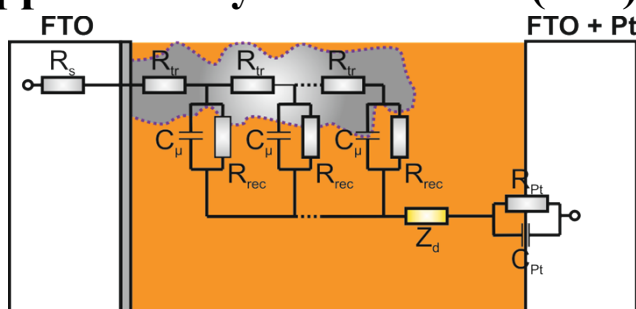

**ESI Fig. 1** Equivalent circuit diagram for fitting the impedance data.  $R_s$  describes the series resistance of the transparent conductive oxide,  $R_{tr}$  the transport resistance of the porous semiconductor, the RC element consisting of  $C_{\mu}$  and  $R_{rec}$  the charge transfer at the semiconductor/electrolyte interface,  $Z_d$  a Warburg element to describe the charge transfer in the electrolyte and the RC element  $R_{pt}$  and  $C_{pt}$  to describe the charge transfer at the electrolyte/platinum interface.

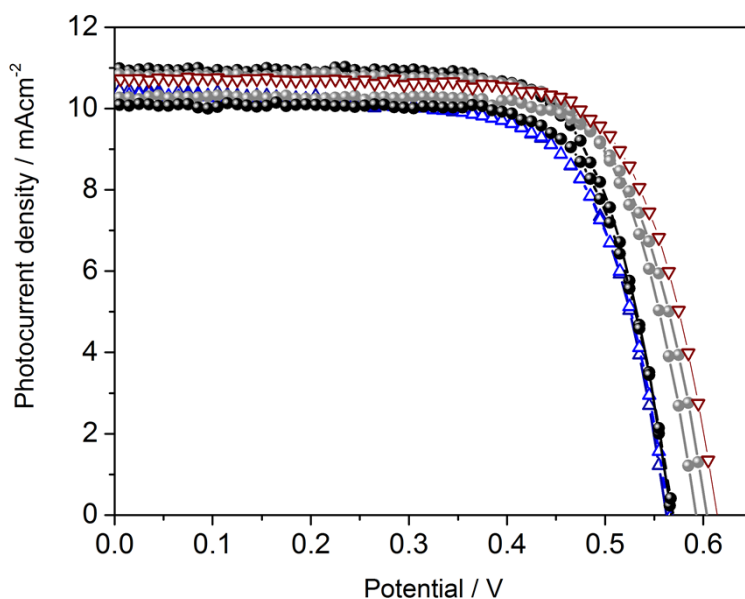

**ESI Fig. 2** IV-curves under AM 1.5 conditions of DSC of porous ZnO electrodeposited from a perchlorate-containing electrolyte on an electrodeposited blocking layer from a perchlorate solution (- $\Delta$ -) or on a sputter-deposited blocking-layer (- $\bullet$ -) and of porous ZnO electrodeposited from a chloride-containing electrolyte on a sputter-deposited blocking layer (- $\square$ -). For comparison an IV-curve of established DSC of porous ZnO electrodeposited from a chloride-containing electrolyte on an electrodeposited blocking layer from a chloride solution is also shown (- $\nabla$ -).

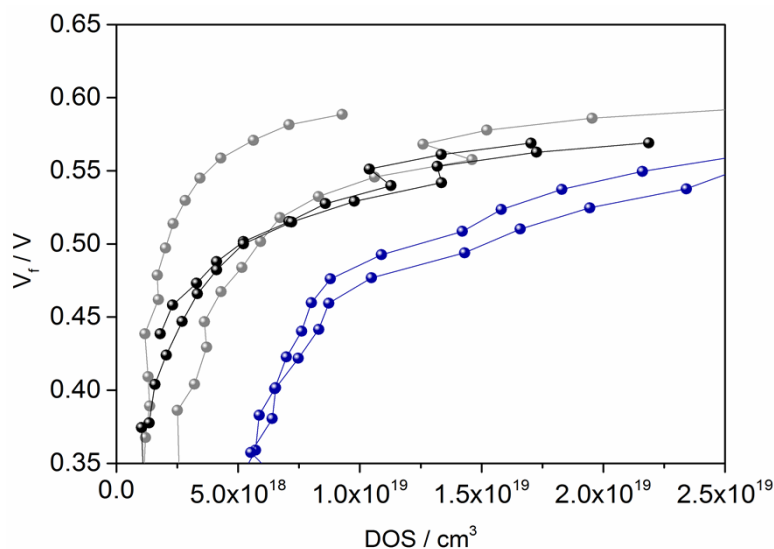

**ESI Fig. 3** Internal voltage plotted against the density of states in DSC of porous ZnO electrodeposited from a perchlorate-containing electrolyte on an electrodeposited blocking layer from a perchlorate solution (- $\bullet$ -) or on a sputter-deposited blocking-layer (- $\square$ -) and of porous ZnO electrodeposited from a chloride-containing electrolyte on a sputter-deposited blocking layer (- $\nabla$ -).

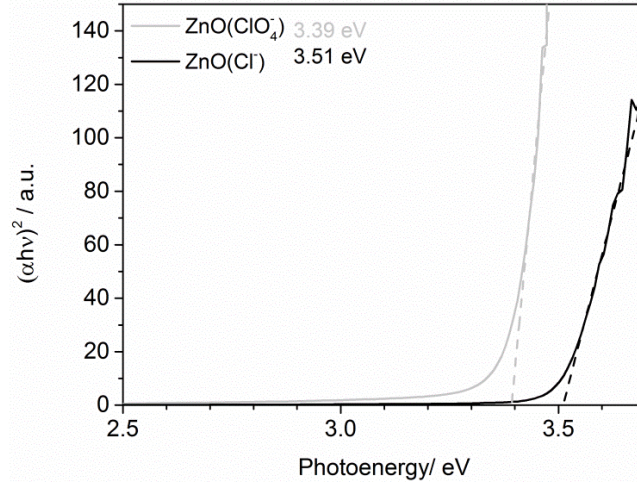

**ESI Fig. 4** Tauc-Plot of a ZnO(Cl) and ZnO(ClO<sub>4</sub>) sample to determine the optical band gap of both different ZnO samples

| Sample                 | C / at. %  | O / at. %  | Cl / at. % | Zn / at. % |
|------------------------|------------|------------|------------|------------|
| ZnO(Cl)                | 17.74±0.42 | 50.76±1.70 | 0.16±0.02  | 31.44±1.96 |
| ZnO(ClO <sub>4</sub> ) | 14.64±2.06 | 59.92±6.23 | 0.16±0.06  | 21.91±5.00 |

**ESI Tab. 1** Mean values of atomic percentages of film constituents obtained from energy-dispersive X-ray analysis (EDX) of at least two samples. It should be noted that EDX does not allow to quantitatively discuss changes in the range below 1 at. %.
